# Supplementary material
Source: publisher figshare collection journal article supplement (https://karger.figshare.com/ndownloader/files/18532913)
Supplement: Supplementary file 1 [file 18532913]

## Sheet: Sheet1
Year	Reference	Region	N	Strain reference	Isolation site	Clinical details
2014	Li et al	China	7	8236,8283,8472,8544,8568,E500,E384	Vulvovaginal mucosa	Vulvovaginal candidiasis
2016	Wang et al	China	6	NS	NS	NS
2017	Hou et al	China	12		BC(9);AF(2);CSF(1)
2017	This study	China	11	8236,8283,8472,8544,8568,E500,E384,E156,F187,PD164,PD229	Vulvovaginal mucosa	Vulvovaginal candidiasis
2014	Chao, et al	Taiwan,China	2	NS	NS
2011	Enache -Angoulvant et al	France	26	including CBS 9983	NS	NS
2012	Parmeland, et al	France	1	NS	BC	NS
2014	Swoboda-Kopec, et al	Poland	1	NS	Peri-aortic absces	NS
			3	NS	lower Respiratory tract
			1	NS	body fluid
			8	NS	Urine	NS
2008	Borman, et al	UK	3	NCPF 8845,8848,8842	Mouth	OPC
			4	NCPF C. nivariensis 5, C. nivariensis 9, NCPF 8853,8846	NS
			2	NCPF 8843 and C. nivariensis 7	Pelvic abscess	NS
			2	NCPF 8847, NCPF 8850	Peritoneal fluid	Malignancy, peritonitis
2008	Borman, et al	UK	3	NCPF 8844, NCPF 8852, NCPF C. nivariensis 16,	BC	Neutropenia, AML, NS
2015	Fraser et al	UK	10	NS	NS	NS
2013	Gorton, et al	UK	1	NS	Urine	Renal transplant
2012	Fraser et al	UK	6	NCPF 8845,8846,8848,8850,8853,8862	NS	NS
2010	Chowdhary, et al	India	1	VPCI 1293/08	BC	Diabetes
			1	VPCI 32/08	Mouth	OPC, HIV
2015	Ghosh et al	India	2	NS	NS	NS
2013	Sharma, et al	India	4	VPCI 774/P/12(CBS 12759), VPCI 785/P/12(CBS 12760), VPCI 818/P/12, 826/P/12(CBS 12762)	Vagina	Vulvovaginal candidiasis
			3	DMic 962066;DMic962070;DMic134582
2014	Swoboda-Kopec, et al	Poland	1	NS	Peri-aortic absces	NS
			3	NS	lower Respiratory tract
			1	NS	body fluid
			8	NS	Urine	NS
2008	Bishop, et al	USA	1	NCPF 8849	Exit site swab	CAPD
2017	Gade et al	USA	1	B7346(KU561811)	BC	NS
2012	Slechta et al	USA	5	NS	BC	NS
2013	Ellen Decat et al	Netherlands	4	CBS 9983,CBS 9984,CBS 9985,CBS 10161	NS
2015	Aznar-Marin	Spain	4	NS	Vulvovaginal mucosa	diabetes(2);pregnant(2)
2015	Gil-Alonso et al	Spain	3	UPV/EHU 11-284;CBS 9984;CECT 11998T	NS	NS
2005	Alcoba-Florez, et al	Spain	1	HC5937-63	BAL
			1	HC4292-20= CECT, CBS 9983, NRRL Y 48269,	BC	Pancreatitis,
			1	HC7609-30	Urine	lumbar pain, myomectomy
2012	Telleria et al	Spain	2	UPV 04.228 UPV 04.230	NS	NS
2011	Pinto, et al	Australia	10	NS	NS
2009	Lockhart, et al	Australia	1	NS	pleural fluid	pleural fluid
2017	Morales-Lo´pez,et al	Argentina	5		Throat(1);renal catheter(1);urine(1);continuous peritoneal dialysis bag(1);NO Data(1)
2014	Tay, et al	Malaysia	1	UMMC139	BC	prolonged hospital stay，use of TPN
			1	UMMC145	high vaginal swab	vaginitis
2016	Passera et al	Italy	1	NS	Vulvovaginal mucosa	Premature ruptured membranes
2015	Figueiredo-Carvalho et al	Brasil	1	893391/INCA	Nasal secretion	Non-Hodhkin lymphoma
2016	Ziesing et al	Germany	1			cystic fibrosis
2011	Van Herendeal et al	Belglum	1	NS	Ns	NS
2008	Wahyuningsih, et al	Indonesia	1	CBS 10161, C-127	Mouth	OPC, HIV
2007	Fujita, et al	Japan	1	K 16661,	BC	rheumatoid arthritis, PEN
	Note: NS, not stated; BC, blood culture; BAL, bronchiole alveolar lavage; AML, acute myeloid leukemia; PEN, parenteral nutrition; ALTCL, anaplastic large-T-cell lymphoma; VVC, vulvo-vagina candidiasis; OPC, oropharyngeal candidiasis; HIV, human deficiency virus; CSF ,cerebrospinal fluid
